# Supplementary material for: Transcriptomic Mapping of Neural Diversity, Differentiation and Functional Trajectory in iPSC-Derived 3D Brain Organoid Models
Source: MDPI journal article supplement (doi:10.3390/cells10123422), 2021-12-05
Supplement: s1 [file s1]

# Transcriptomic Mapping of Neural Diversity, Differentiation and Functional Trajectory in iPSC-Derived 3D Brain Organoid Models

Kiavash Kiaee <sup>a,b,\*</sup>, Yasamin A. Jodat <sup>a,b</sup>, Nicole J. Bassous <sup>a</sup>, Navneet Matharu <sup>c,d,e</sup>, Su Ryon Shin <sup>a,\*</sup>

Table S1. Gene subsets governing specific neural functions.

| Axon Guidance | Axon Development | Neuronal Action Potential | Neuron Neuron Synaptic Transmission | NOTCH Signaling | WNT Signaling | Neuron Differentiation | BMP Signaling |
|---------------|------------------|---------------------------|-------------------------------------|-----------------|---------------|------------------------|---------------|
| ABL1          | ABL1             | ANK3                      | DLGAP2                              | ADAM17          | APC           | ABI2                   | ACVR2A        |
| ABLIM1        | ACTB             | CACNA1                    | DRD2                                | APH1A           | APC2          | ABITRAM                | ACVR2B        |
| ABLIM2        | ACTBL2           | G                         | KIF1B                               | CIR1            | AXIN1         | ABL1                   | ACVRL1        |
| ABLIM3        | ADARB1           | CACNA1                    | PTEN                                | CREBBP          | AXIN2         | ABL2                   | AMH           |
| ARHGEF1       | ADCY1            | H                         | TMOD2                               | CTBP1           | BTRC          | ACAP3                  | AMHR2         |
| 2             | ADGRB1           | CACNA1I                   | VDAC1                               | CTBP2           | CACYBP        | ACP4                   | BMP10         |
| CDC42         | AFG3L2           | CHRNA1                    |                                     | DLL1            | CAMK2A        | ACSL3                  | BMP2          |
| CDK5          | ALCAM            | FGF12                     |                                     | DLL3            | CAMK2B        | ACSL4                  | BMPR1A        |
| CFL1          | AMIGO1           | FMR1                      |                                     | DLL4            | CAMK2D        | ACTB                   | BMPR1B        |
| CFL2          | ANAPC2           | GBA                       |                                     | DTX1            | CAMK2G        | ACTBL2                 | BMPR2         |
| CHP1          | ANK3             | GPBR1                     |                                     | DTX2            | CCND1         | ACTL6B                 | CER1          |
| CHP2          | ANOS1            | GPR35                     |                                     | DTX3            | CCND2         | ACTR2                  | CHRD1         |
| CXCL12        | APBB1            | GPR88                     |                                     | DTX3L           | CCND3         | ADAM10                 | FSTL1         |
| CXCR4         | APOA1            | GRIK2                     |                                     | DTX4            | CER1          | ADARB1                 | GDF2          |
| DCC           | APOD             | KCNA1                     |                                     | DVL1            | CHD8          | ADCY1                  | GREM2         |
| DPYSL2        | APOE             | KCNA2                     |                                     | DVL2            | CHP1          | ADCY6                  | NOG           |
| DPYSL5        | APP              | KCND2                     |                                     | DVL3            | CHP2          | ADCYAP1                | SKI           |
| EFNA1         | ARHGAP35         | KCNMB2                    |                                     | EP300           | CREBBP        | ADGRB1                 | SMAD1         |
| EFNA2         | ARHGAP4          | KCNMB3                    |                                     | HDAC1           | CSNK1A1       | ADGRB3                 | SMAD4         |
| EFNA3         | ARHGDIA          | KCNMB4                    |                                     | HDAC2           | CSNK1A1       | ADGRF1                 | SMAD5         |
| EFNA4         | ARTN             | MTNR1B                    |                                     | HES1            | L             | ADGRV1                 | SMAD6         |
| EFNA5         | ARX              | MYH14                     |                                     | HES5            | CSNK1E        | ADM                    | SMAD7         |
| EFNB1         | ATL1             | P2RX1                     |                                     | JAG1            | CSNK2A1       | ADNP2                  | SMAD9         |
| EFNB2         | ATOH1            | P2RX3                     |                                     | JAG2            | CSNK2A2       | ADORA2A                | SMURF1        |
| EFNB3         | ATP8A2           | P2RX4                     |                                     | KAT2A           | CSNK2B        | ADRA2B                 | SMURF2        |
| EPHA1         | AUTS2            | SCN10A                    |                                     | KAT2B           | CTBP1         | ADRA2C                 | UBE2D1        |
| EPHA2         | B3GNT2           | SCN11A                    |                                     | LFNG            | CTBP2         | AFG3L2                 | UBE2D3        |
| EPHA3         | B4GALT5          | SCN1A                     |                                     | MAML1           | CTNNB1        | AGBL4                  | ZFYVE16       |
| EPHA4         | B4GALT6          | SCN2A                     |                                     | MAML2           | CTNNBIP       | AGER                   |               |
| EPHA5         | BAIAP2           | SCN3A                     |                                     | MAML3           | 1             | AGRN                   |               |

|              |          |       |        |        |         |
|--------------|----------|-------|--------|--------|---------|
| <b>EPHA6</b> | BARHL2   | SCN4A | MFNG   | CUL1   | AGTPBP1 |
| <b>EPHA7</b> | BCL11B   | SCN5A | NCOR2  | CXXC4  | AHI1    |
| <b>EPHA8</b> | BCL2     | SCN7A | NCSTN  | DAAM1  | AKT1    |
| <b>EPHB1</b> | BDNF     | SCN8A | NOTCH1 | DAAM2  | ALCAM   |
| <b>EPHB2</b> | BMP7     | SCN9A | NOTCH2 | DKK1   | ALDH1A2 |
| <b>EPHB3</b> | BMPR1B   |       | NOTCH3 | DKK2   | ALK     |
| <b>EPHB4</b> | BMPR2    |       | NOTCH4 | DKK4   | ALKAL1  |
| <b>EPHB6</b> | BOC      |       | NUMB   | DVL1   | ALKAL2  |
| <b>FES</b>   | BRSK1    |       | NUMBL  | DVL2   | ALKBH1  |
| <b>FYN</b>   | BRSK2    |       | PSEN1  | DVL3   | ALS2    |
| <b>GNAI1</b> | BSG      |       | PSEN2  | EP300  | AMIGO1  |
| <b>GNAI2</b> | C12orf57 |       | PSENEN | FBXW11 | ANAPC2  |
| <b>GNAI3</b> | C9orf72  |       | PTCRA  | FOSL1  | ANK3    |
| <b>GSK3B</b> | CAMSAP2  |       | RBPJ   | FRAT1  | ANKRD1  |
| <b>HRAS</b>  | CASP3    |       |        | FRAT2  | ANKRD27 |
| <b>ITGB1</b> | CCK      |       |        | FZD1   | ANKS1A  |
| <b>KRAS</b>  | CCKAR    |       |        | FZD10  | ANOS1   |
| <b>L1CAM</b> | CDH11    |       |        | FZD2   | AP2A1   |
| <b>LIMK1</b> | CDH2     |       |        | FZD3   | APBB1   |
| <b>LIMK2</b> |          |       |        | FZD4   |         |
|              |          |       |        | FZD5   |         |

**Table S2.** Comparison between the sample properties of the datasets used in this study.

| scRNA-seq data     | Reference             | Identifier | No. of cells | No. of Batches | Differentiation induction period (days) | Neural maturation start day | Notable steps/signaling pathways |
|--------------------|-----------------------|------------|--------------|----------------|-----------------------------------------|-----------------------------|----------------------------------|
| <b>Human Brain</b> | Trujillo et al., 2019 | GSE130238  | 3,480        | 1              | 10                                      | 17                          | Inhibition of BMP, TGF $\beta$   |
| <b>Organoids</b>   | Velasco et al. 2019   | GSE129519  | 99,760       | 15             | 18                                      | 35                          | Inhibition of WNT, TGF $\beta$   |

|                    |                           |                    |                              |                       |                   |      |                                          |
|--------------------|---------------------------|--------------------|------------------------------|-----------------------|-------------------|------|------------------------------------------|
|                    |                           |                    |                              |                       |                   |      | Matrigel coating                         |
|                    | Giandomenico et al., 2019 | GSE124174          | 12,824                       | 1                     | 11                | 20   | Matrigel coating                         |
|                    | Fiddes et al., 2018       | GSE106245          | 13,747                       | 2                     | 18                | 24   | Inhibition of SHH, WNT, BMP, TGF $\beta$ |
|                    | Madhavan et al., 2018     | GSE110006          | 3,743                        | 1                     | 6                 | 25   | Inhibition of BMP, TGF $\beta$           |
|                    | Quadrato et al., 2017     | GSE86153           | 43,706                       | 26                    | 4                 | 8    | Matrigel coating                         |
|                    | Birey et al., 2017        | GSE93811, GSE96045 | 4,953                        | 1                     | 6                 | 25   | Inhibition of BMP, TGF $\beta$           |
|                    | Xiang et al., 2017        | GSE97882           | 23,707                       | 2                     | 10                | 18   | Inhibition of WNT, BMP, TGF $\beta$      |
| <b>Fetal Brain</b> | <b>Reference</b>          | <b>Identifier</b>  | <b>No. of cells</b>          | <b>No. of Batches</b> | <b>Cell count</b> |      |                                          |
|                    | Zhong et al. 2020         | GSE104276          | 2,394                        | 101                   | Female            | Male |                                          |
|                    |                           |                    | Early stage (week 8-13)      |                       | 278               | 136  |                                          |
|                    |                           |                    | Mid-early stage (week 16-19) |                       | 889               | 0    |                                          |
|                    |                           |                    | Middle stage (week 23-26)    |                       | 928               | 143  |                                          |

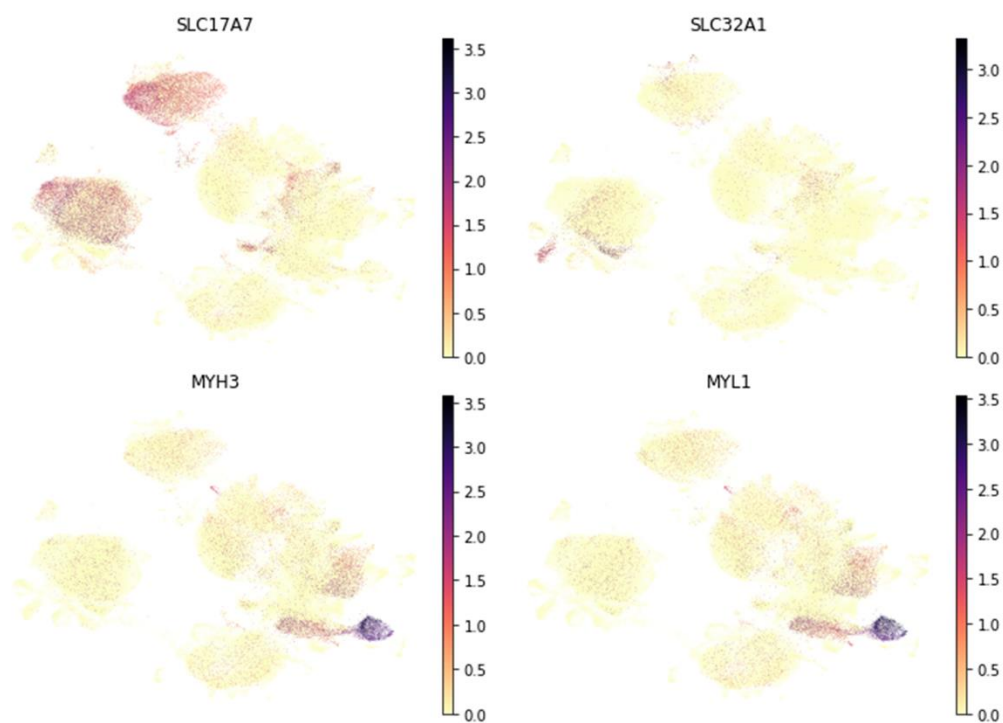

**Figure S1.** Visualization of various genes (top: Glutamatergic, bottom: GABAergic) on the integrated UMAP from organoid and fetal brain samples.

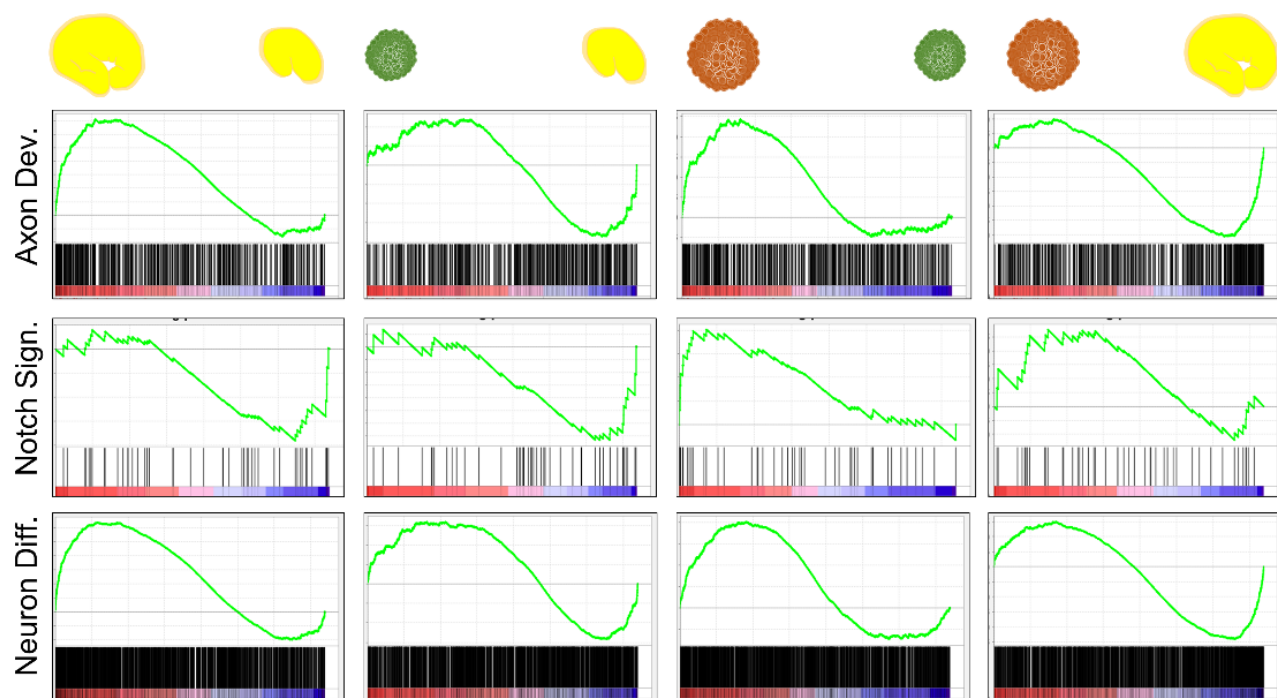

**Figure S2.** GSEA analysis of developmental genesets (axon development, notch signaling and neuron differentiation) between organoid and fetal groups. From left to right: fetal 6-month vs 3-month, organoid 3-month vs fetal 3-month, organoid 6-month vs organoid 3-month, organoid 6-month vs fetal 6-month.

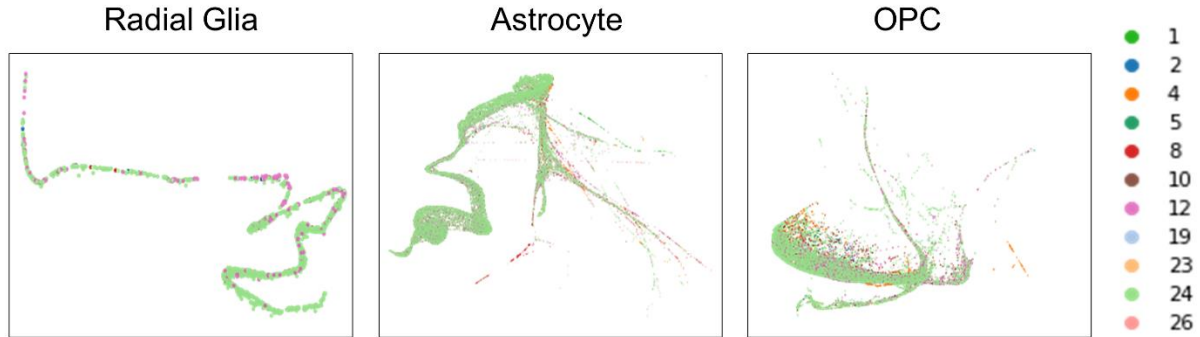

**Figure S3.** Cell type specific developmental trajectory in radial glia, astrocytes and OPCs across timepoints of 1-26 weeks.

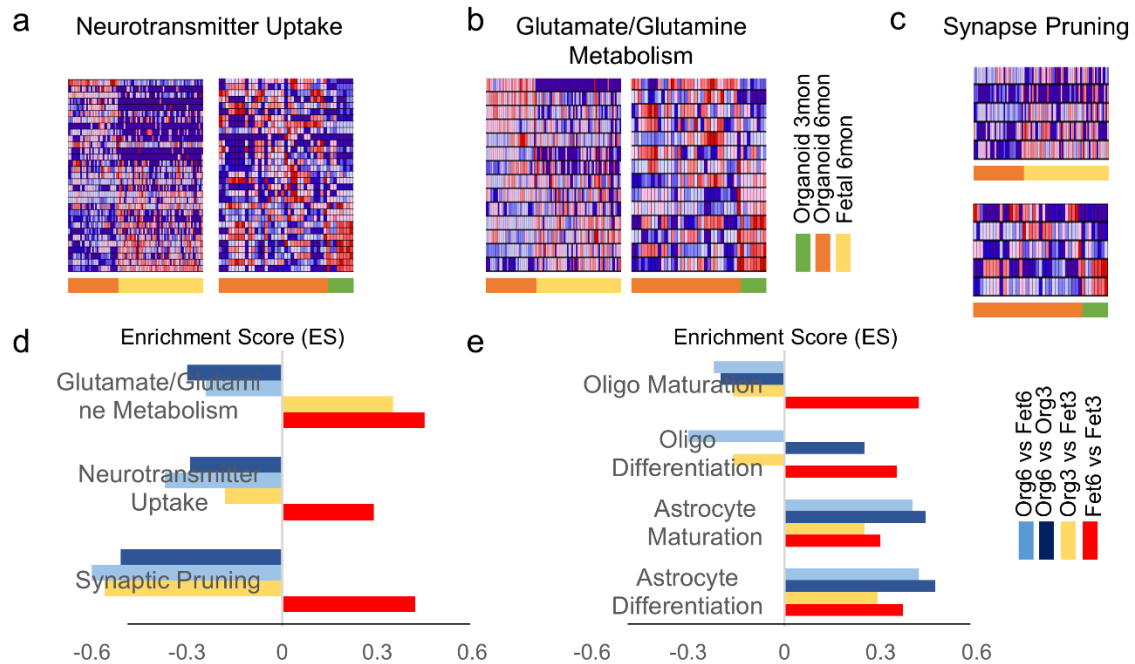

**Figure S4.** Gene set enrichment analysis of functional pathways (a-d), differentiation and maturation (e) relevant to astrocytes in organoid cultures and fetal brain at 3-month and 6-month timepoints. The differentiation gene set in (e) refers to the transformation process of relatively unspecialized cells to astrocytes [oligodendrocytes]. The maturation

gene set refers to the progression of astrocytes [oligodendrocytes] from initial commitment to the astrocyte [oligodendrocyte] fate to a fully functional differentiated cell.
